# Supplementary material for: Intercalation and controlled release of pharmaceutically active compounds from a layered double hydroxide.
Source: Royal Society of Chemistry journal article supplement (doi:10.1039/b106465g), 2001-10-19
Supplement: b106465g.doc [file b106465g.doc]

SUPPLEMENTARY DATA

**Intercalation and Controlled Release of Pharmaceutically Active Compounds from a Layered Double Hydroxide**

Aamir Khan and Dermot O’Hare*

Inorganic Chemistry Laboratory, South Parks Road, Oxford, OX1 3QR, UK,

**Figure S1.** X-ray diffraction patterns of (a) [LiAl2(OH)6]Cl.H2O and

(b) LDH/Ibuprofen Intercalate
